# Supplementary material for: Facile fabrication of Janus magnetic microcapsules via double in situ miniemulsion polymerization
Source: Royal Society of Chemistry journal article supplement (doi:10.1039/c2py20863f), 2012-11-28
Supplement: c2py20863f.pdf [file c2py20863f.pdf]

# Facile fabrication of Janus magnetic microcapsules *via* double *in situ* miniemulsion polymerization

Jianan Zhang\*, Shuilai Qiu, Yulu Zhu, Zhengqi Huang, Beibei Yang, Wenlong Yang,

Mingyuan Wu, Qingyun Wu and Jianjun Yang

School of Chemistry and Chemical Engineering of Anhui University & AnHui Province Key Laboratory of Environment-friendly Polymer Materials, Hefei 230039, China

\*Corresponding author: **Jianan Zhang**, E-mail address: jianan@mail.ustc.edu.cn (J. A. Zhang)

## Conversion ratio of the monomers in the synthesis of magnetic microcapsules

Equation for Conversion ratio of the monomers was obtained by combining Eq. (1) and (2). Eq. (1) is the simple definition of polymer solid contents:

$$N_s = (m_2 - m - m_s) / (m_1 - m - m_s) \quad (1)$$

Where  $N_s$  is the polymer solid contents,  $m$  is the mass of the container,  $m_1$  is the mass of container and solution,  $m_2$  is the mass of solid and container, which was got after drying the container and solution at 105 °C for 3 h.  $m_s$  is the mass of silica in the disperse system, which is obtained from the theoretic calculation of TEOS. So the overall conversion can be written by the Eq. (2):

$$S = (N_s \cdot W) / W_n \quad (2)$$

Where the  $W$  is the total mass of the monomer and the solvent,  $W_n$  is total mass of the monomer.

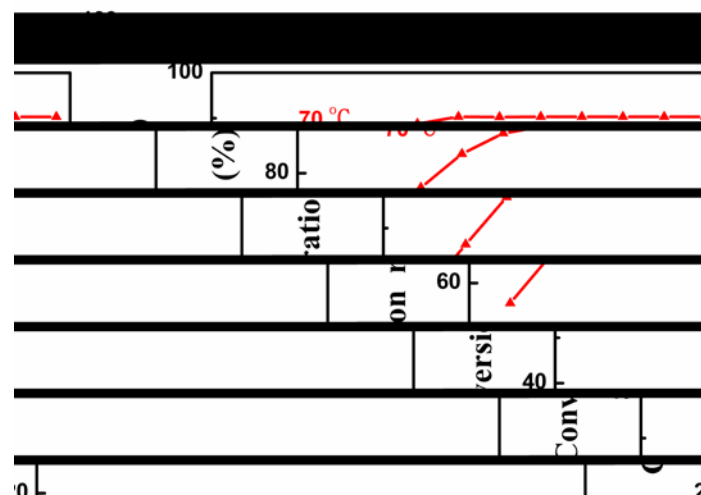

**Fig. S1** The conversion ratio of organic monomers during the polymerization process at 70 °C
